# Supplementary material for: Surface chemistry but not aspect ratio mediates the biological toxicity of gold nanorods in vitro and in vivo
Source: PubMed Central journal article supplement (PMC4476041; doi:10.1038/srep11398), 2015-06-22
Supplement: srep11398-s1.pdf [file srep11398-s1.pdf]

# **Surface chemistry but not aspect ratio mediates the biological toxicity of gold nanorods in vitro and in vivo**

Jiali Wan<sup>1</sup>, Jia-Hong Wang<sup>2</sup>, Ting Liu<sup>1</sup>, Zhixiong Xie<sup>1</sup>, Xue-Feng Yu<sup>2</sup>, Wenhua Li<sup>1\*</sup>

<sup>1</sup>College of Life Sciences, Wuhan University, Wuhan 430072, P R China;

<sup>2</sup>Key Laboratory of Artificial Micro- and Nano-Structures of Ministry of Education, School of Physics and Technology, Wuhan University, Wuhan 430072, China

\*Corresponding author: Wenhua Li

Email: [whli@whu.edu.cn](mailto:whli@whu.edu.cn)

Tel: +86-027-68756711

Fax: +86-027-68756711

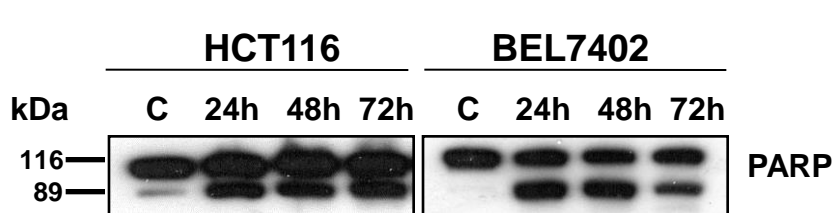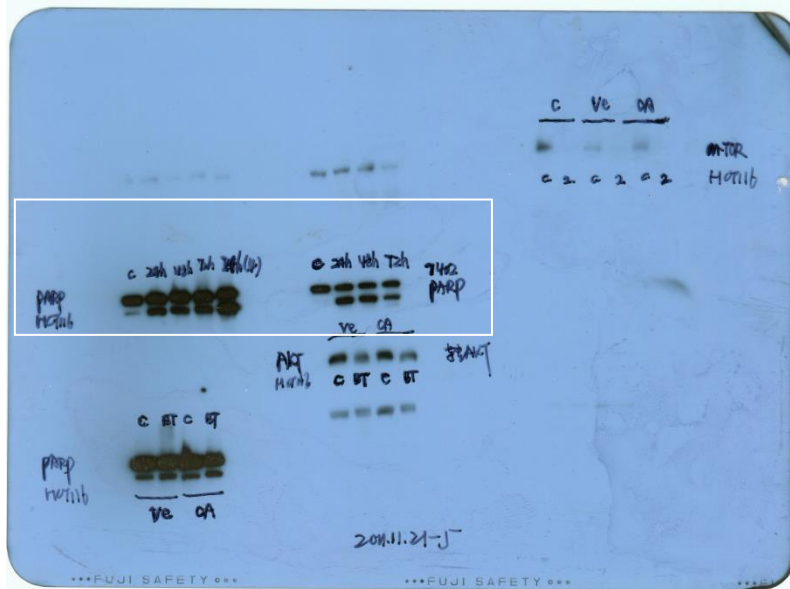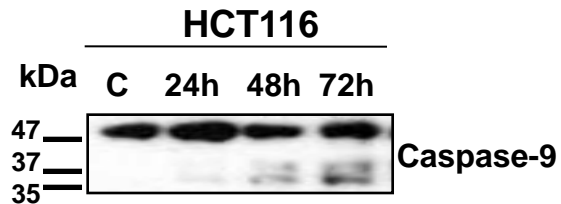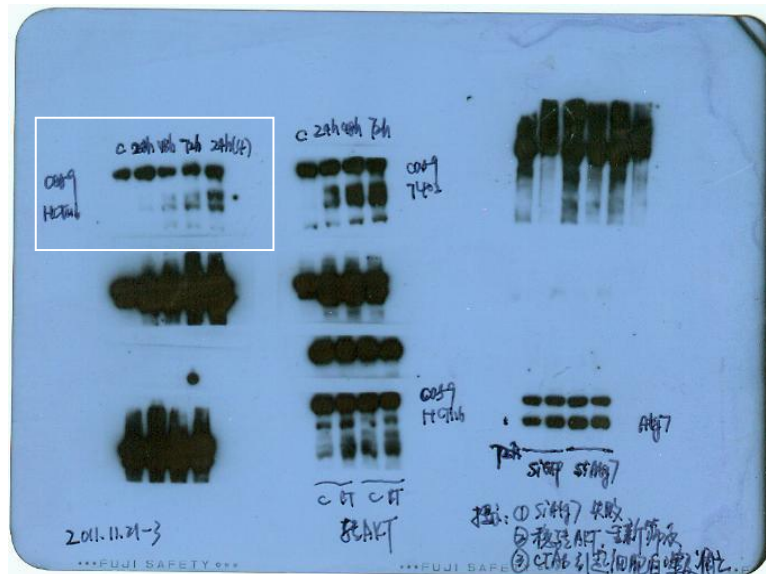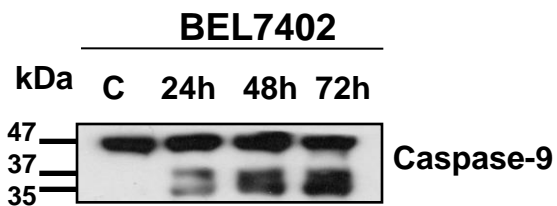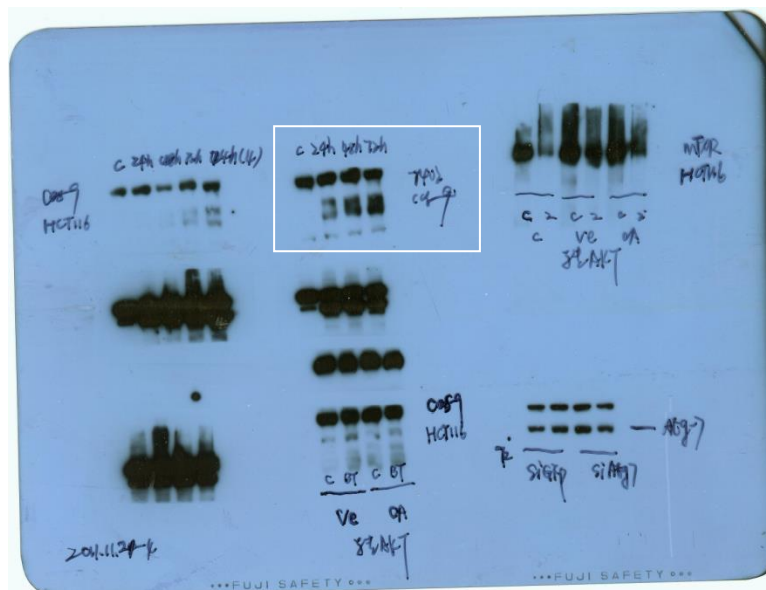

Supplementary Figure 1

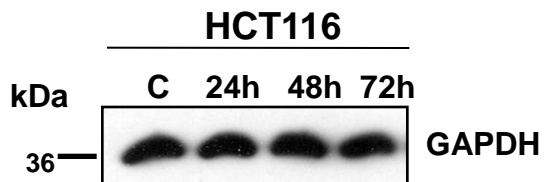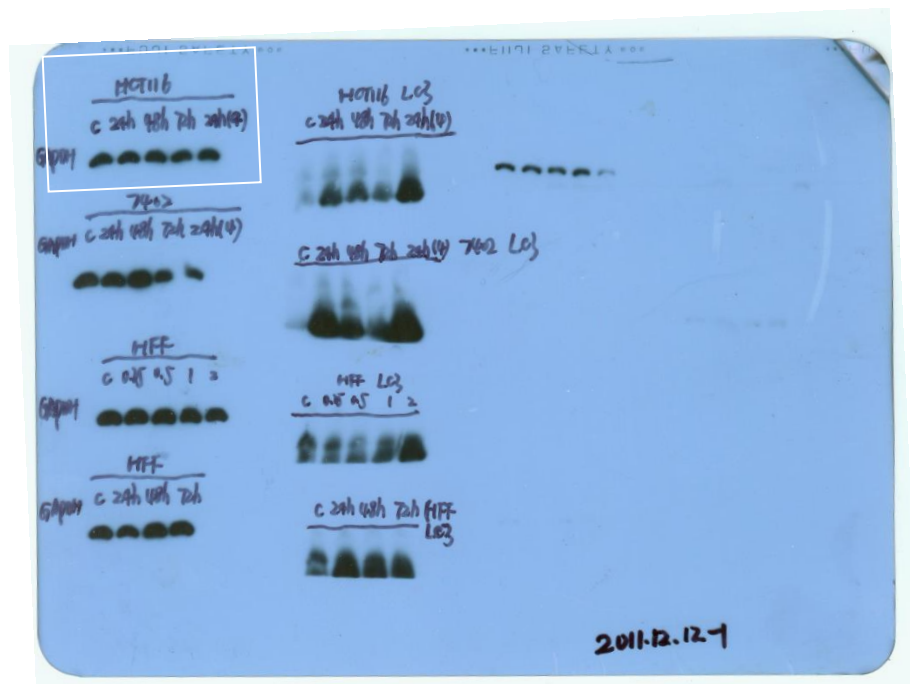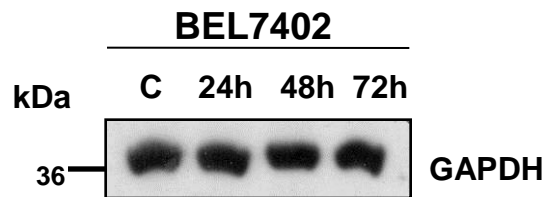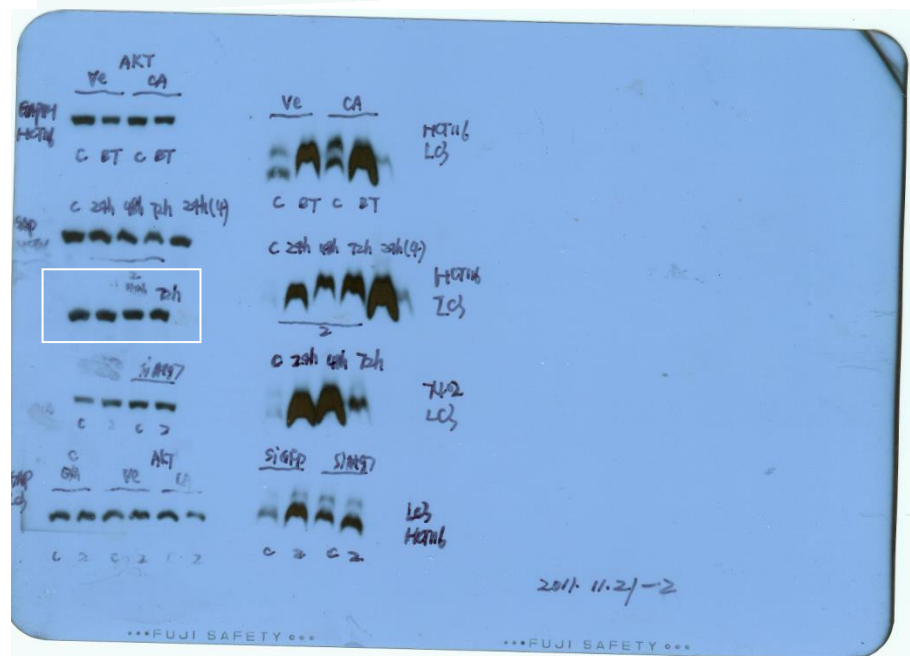

Supplementary Figure 1

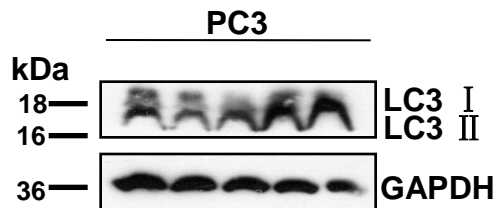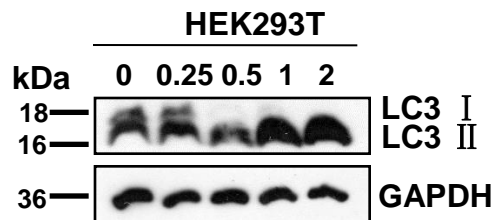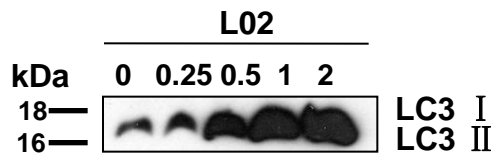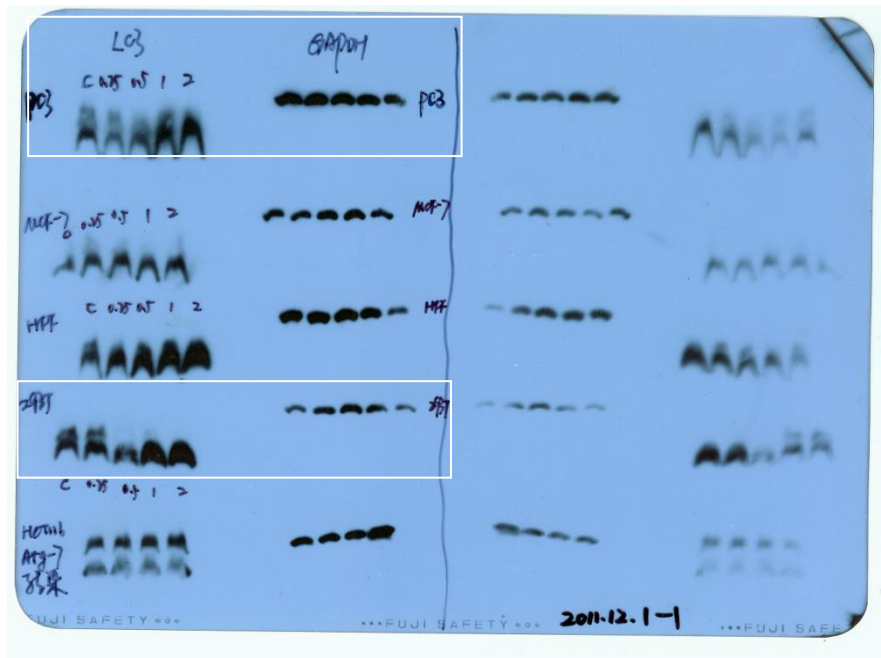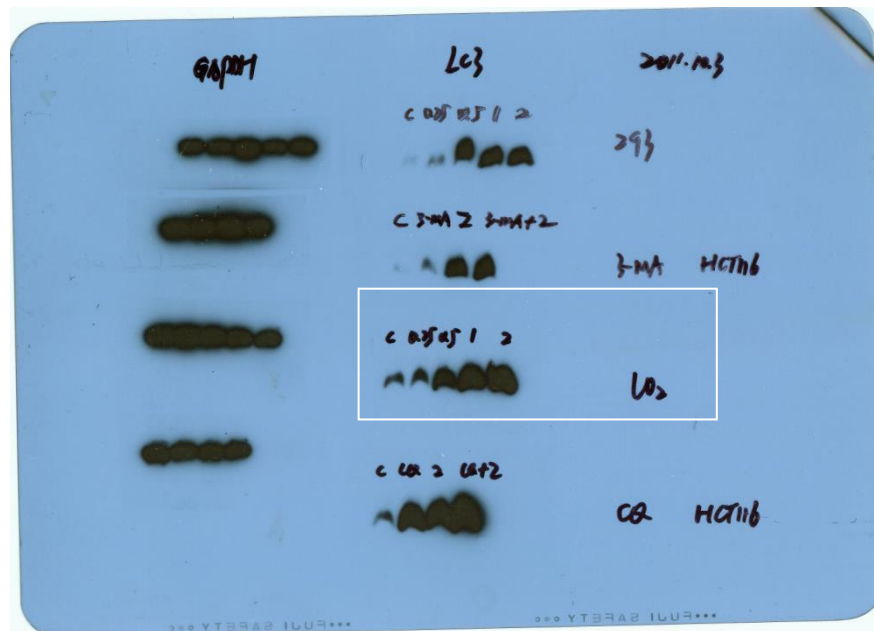

Supplementary Figure 2

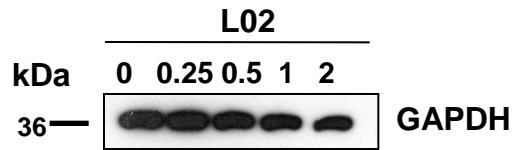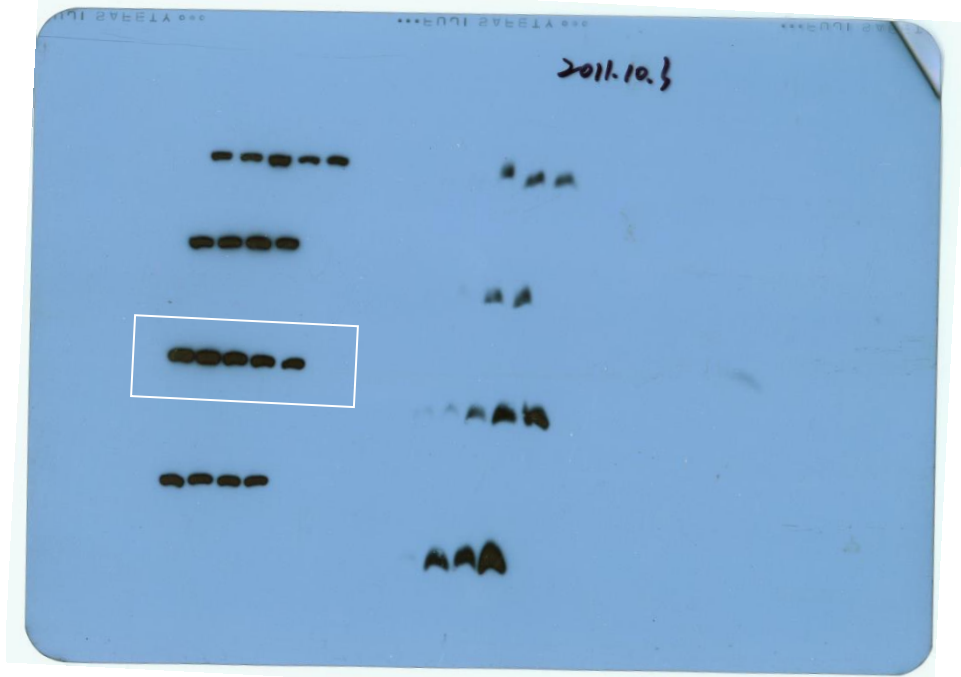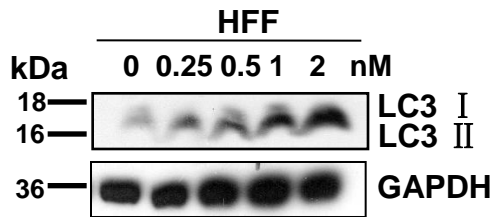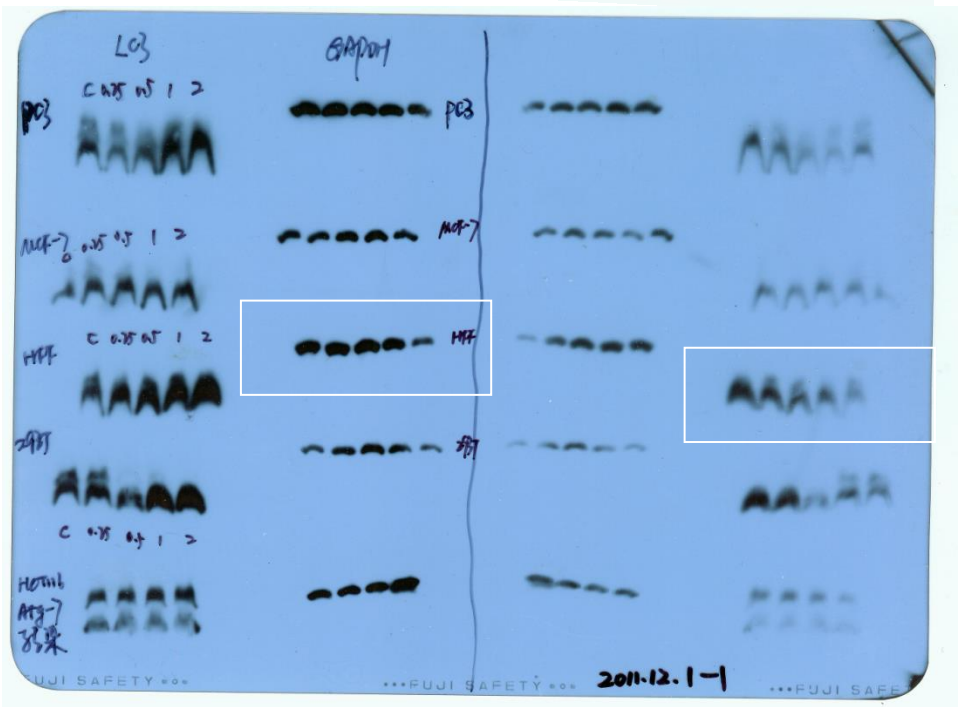

Supplementary Figure 2



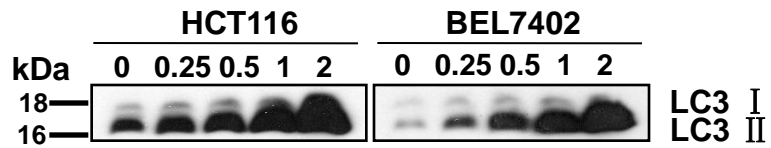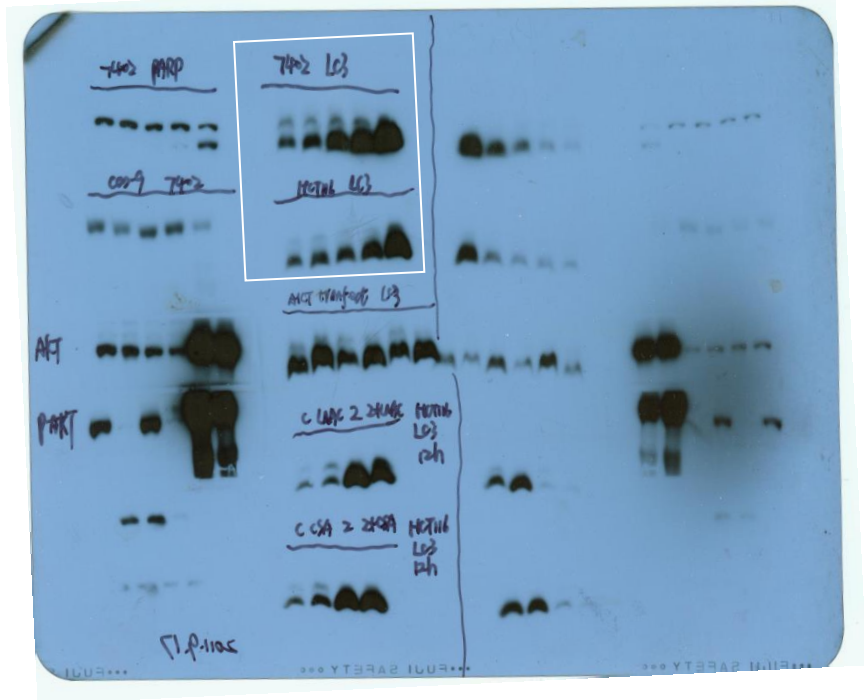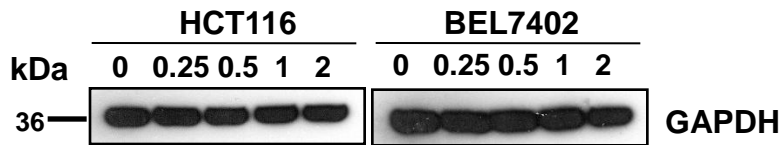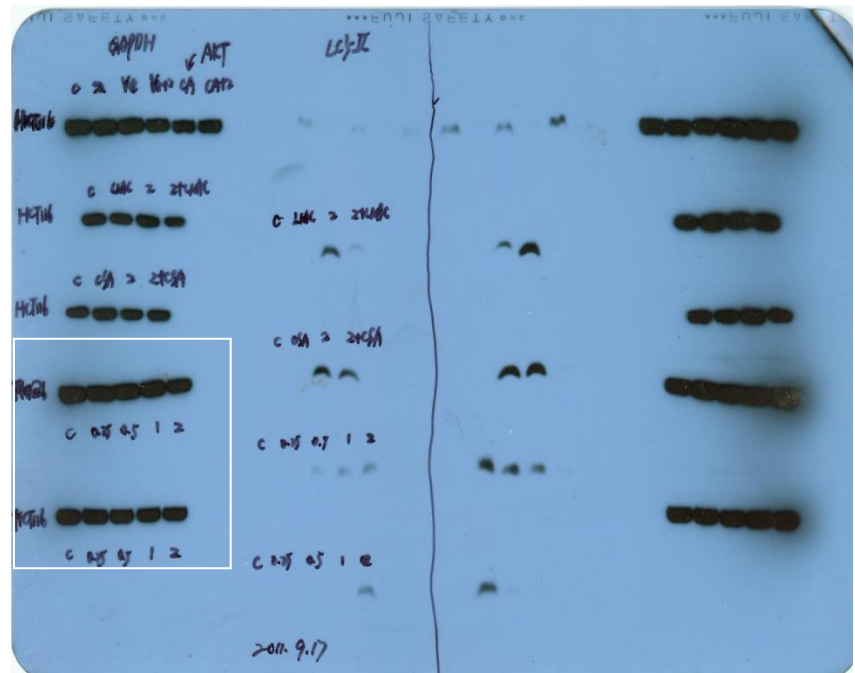

Supplementary Figure 2

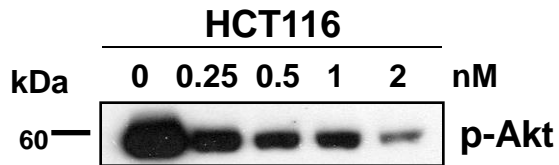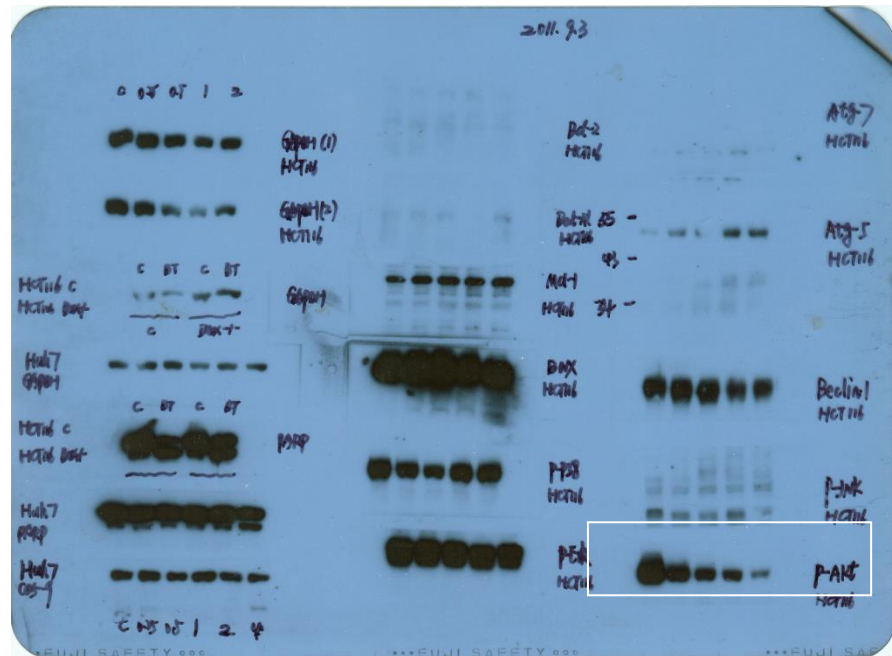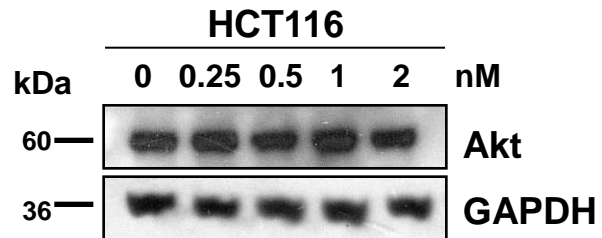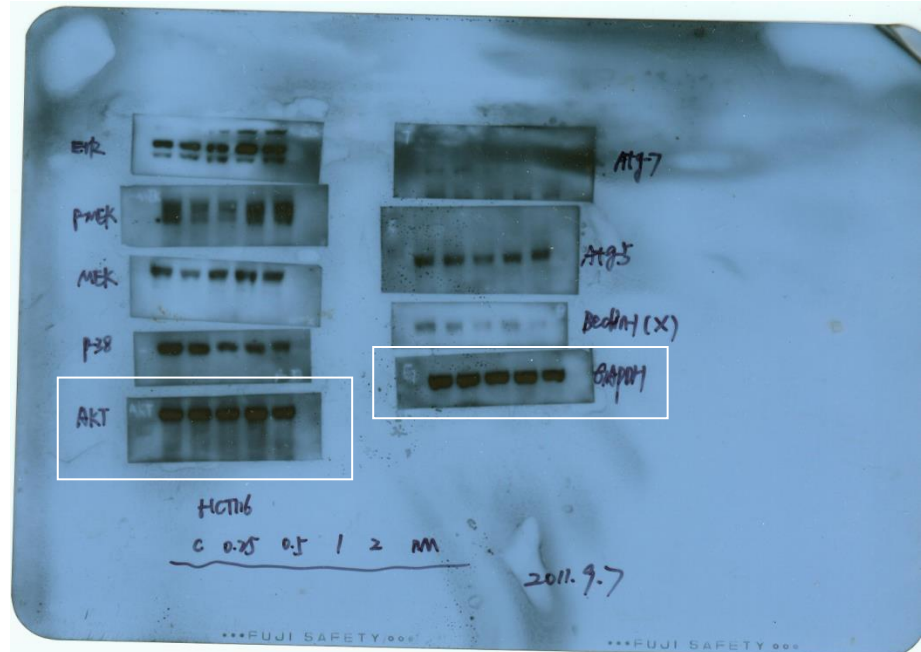

Supplementary Figure 2

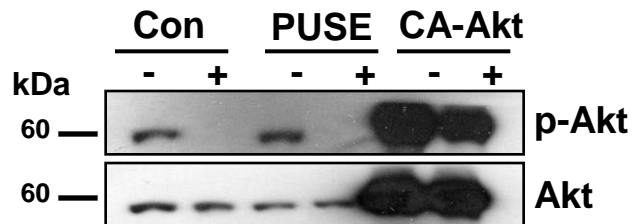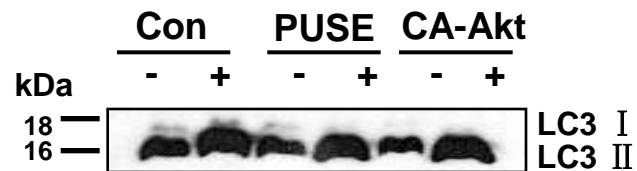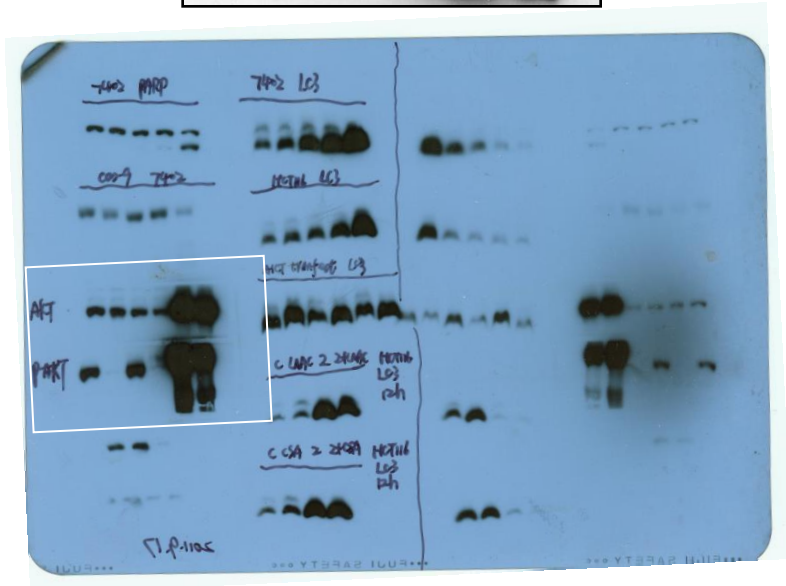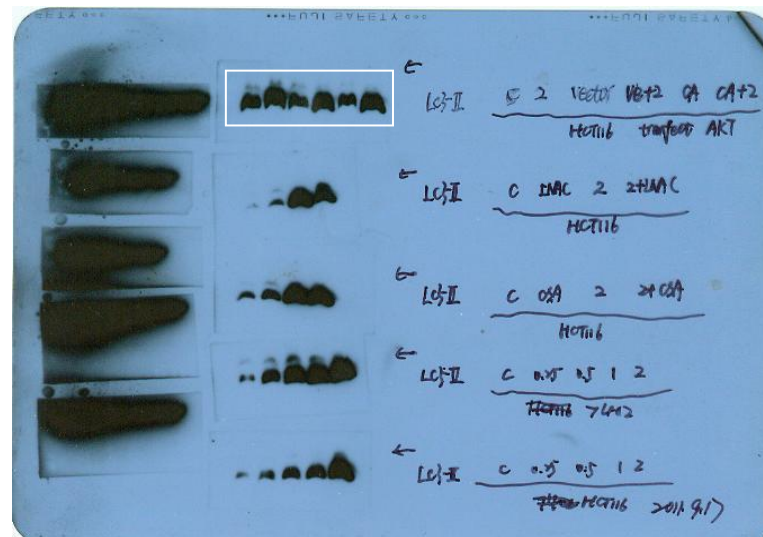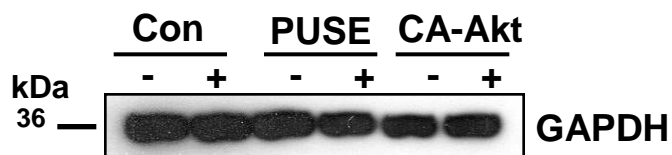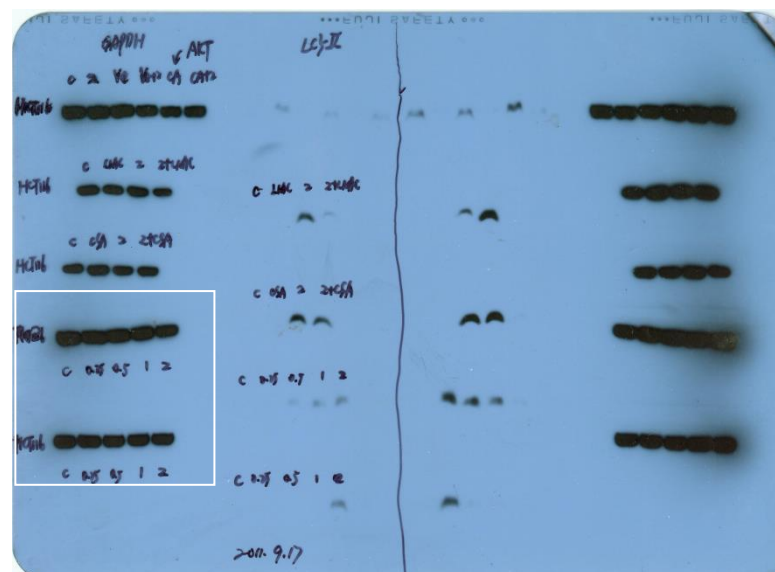

Supplementary Figure 2



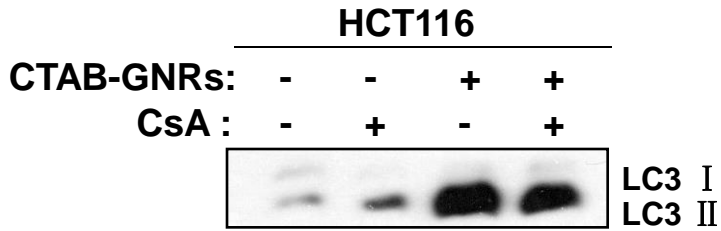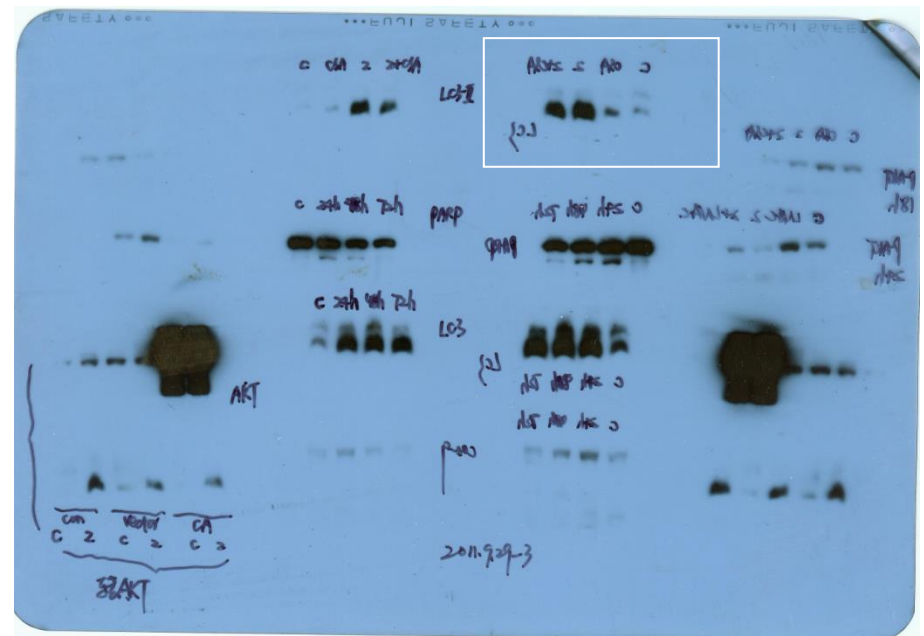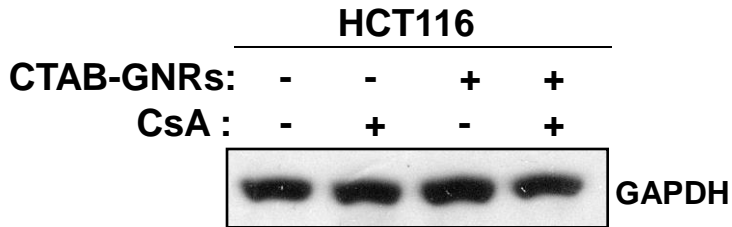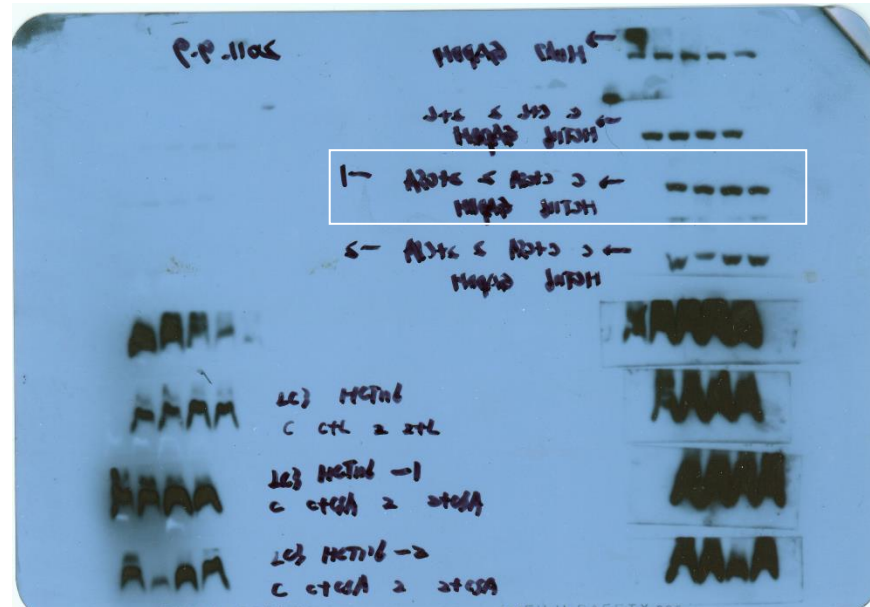

Supplementary Figure 3

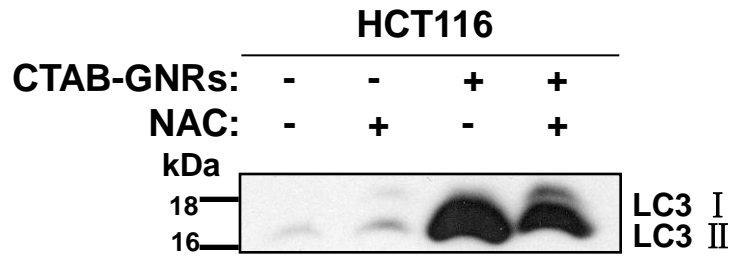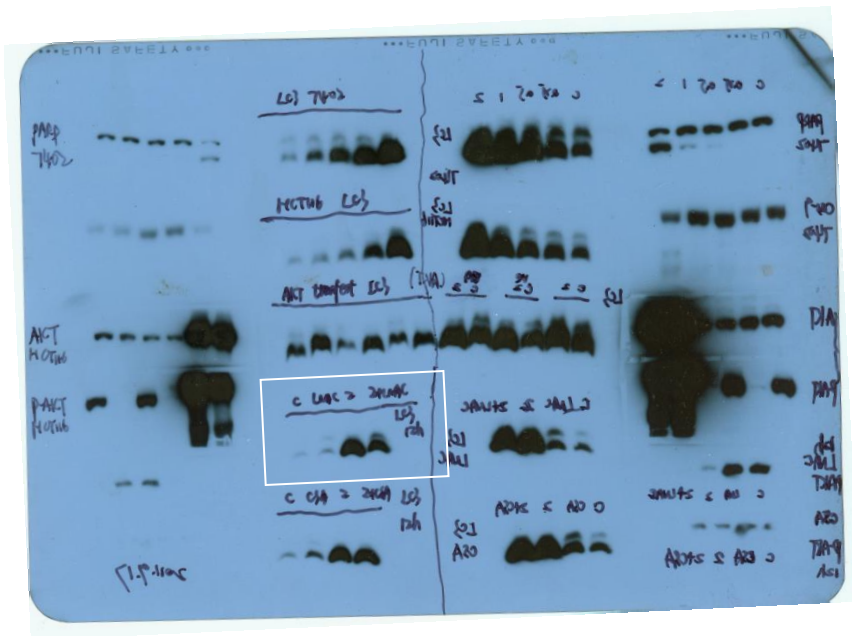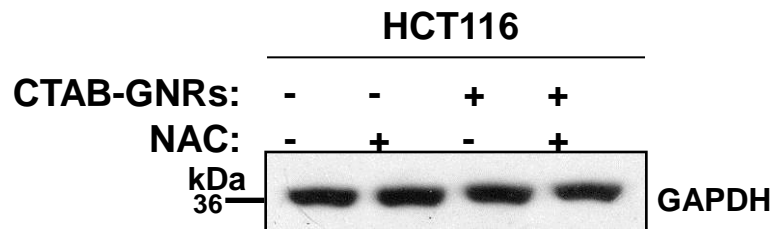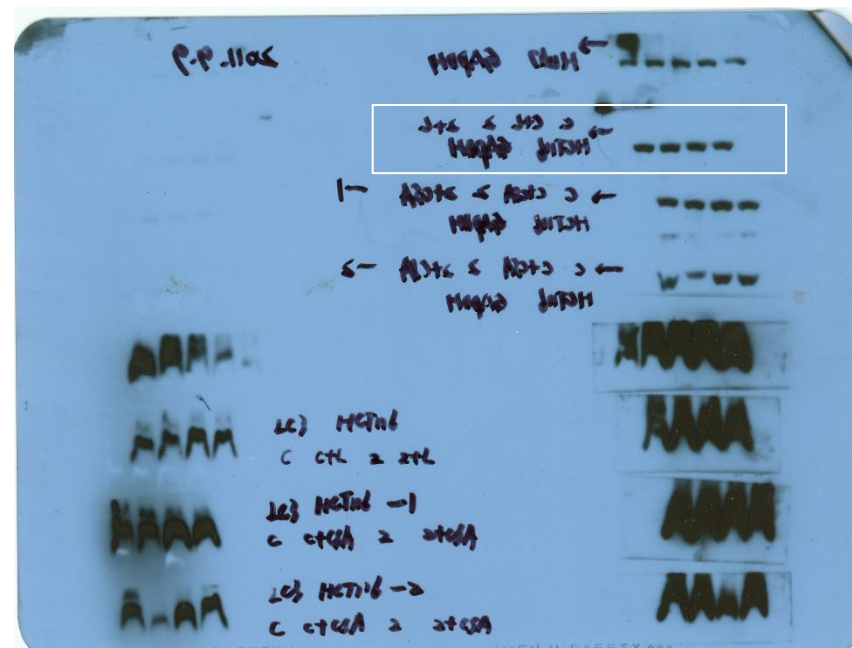

Supplementary Figure 4

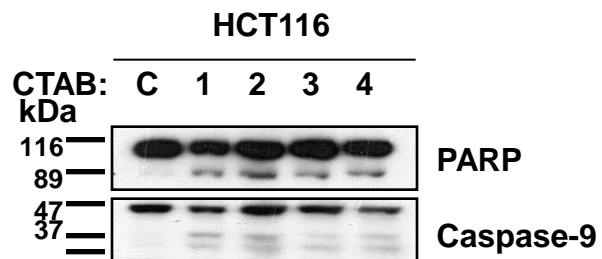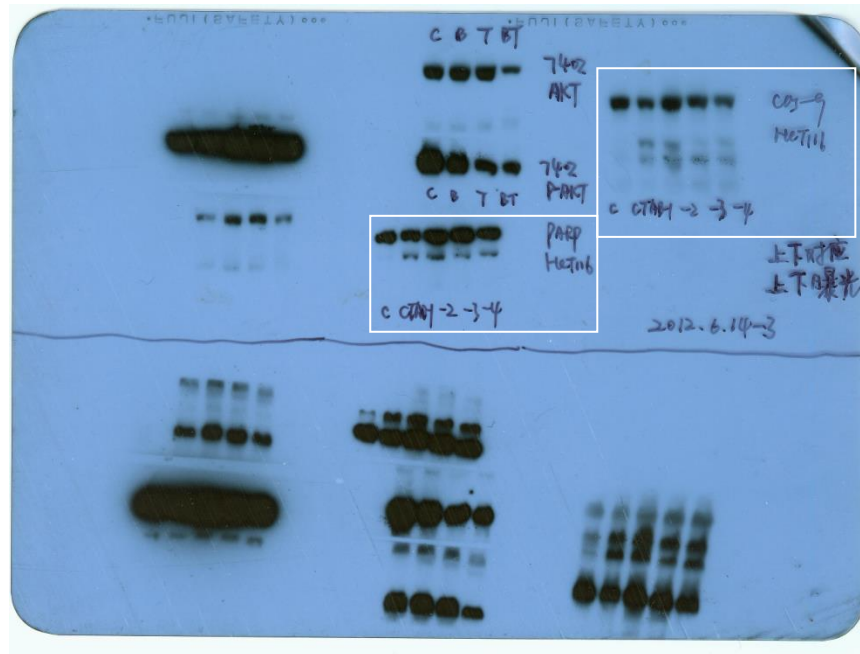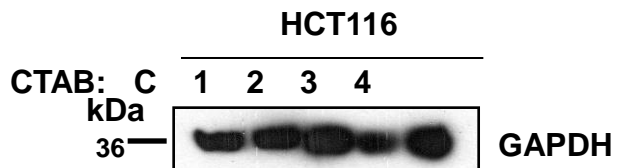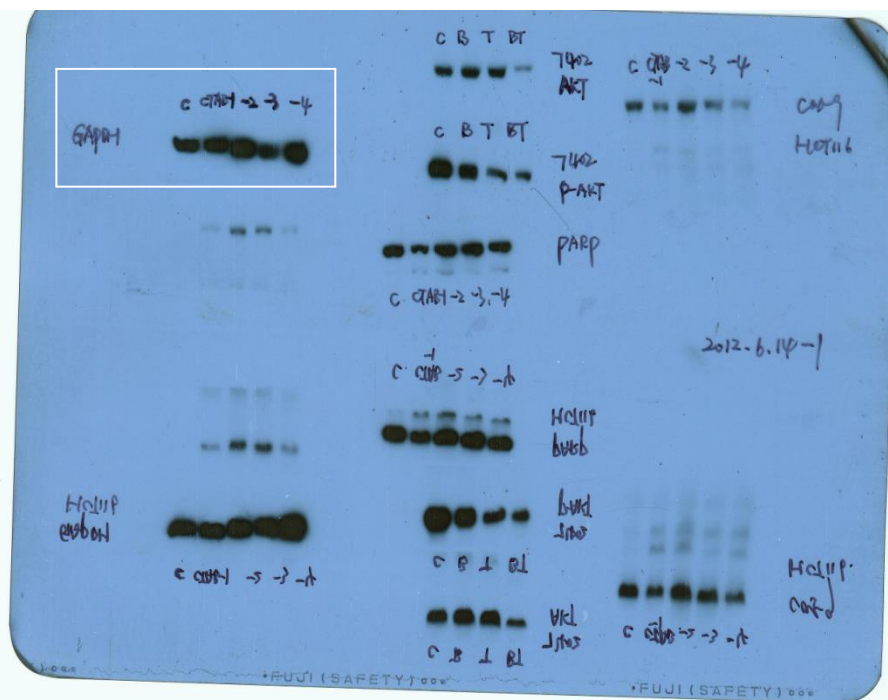

**Supplementary Figure 5**

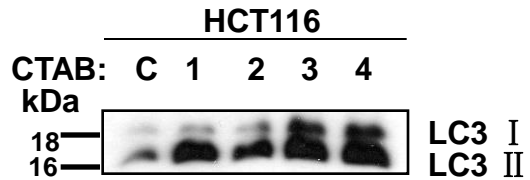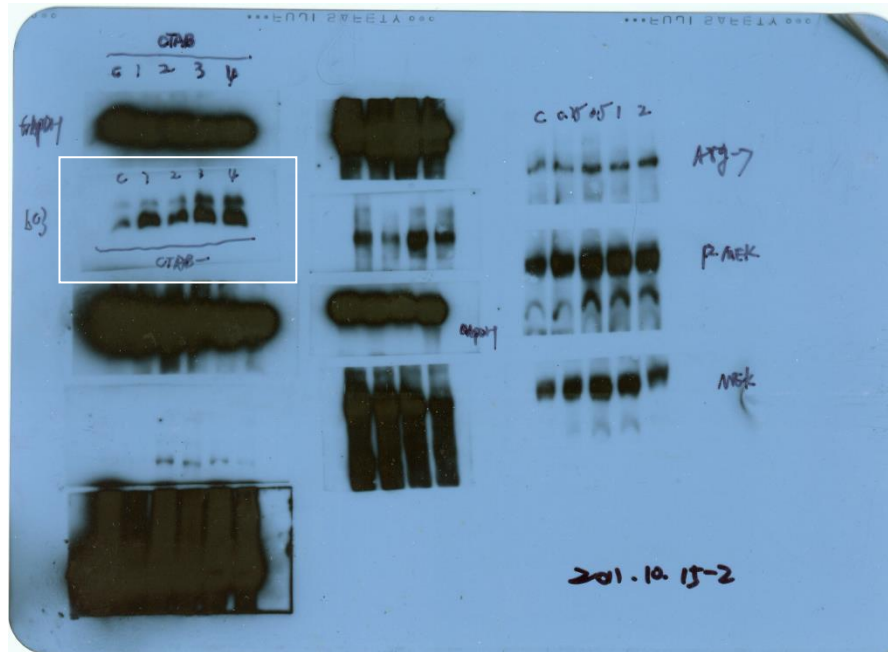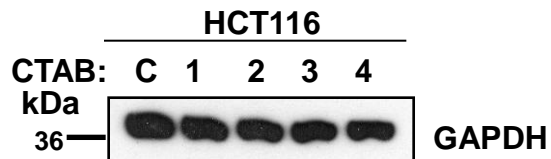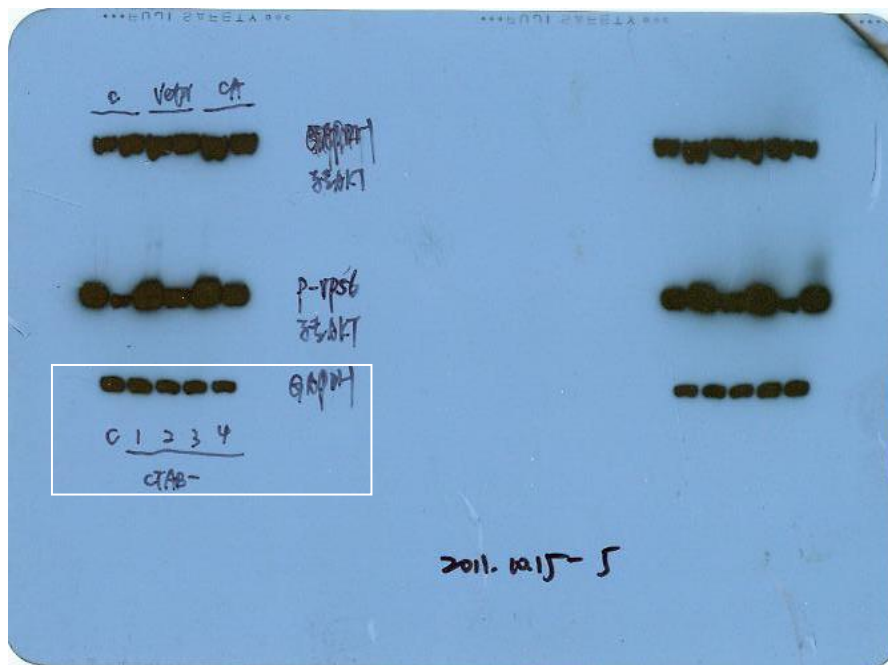

Supplementary Figure 5



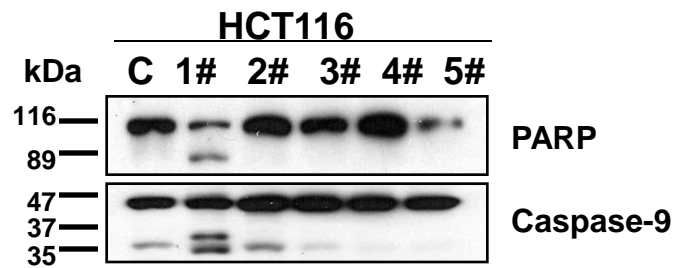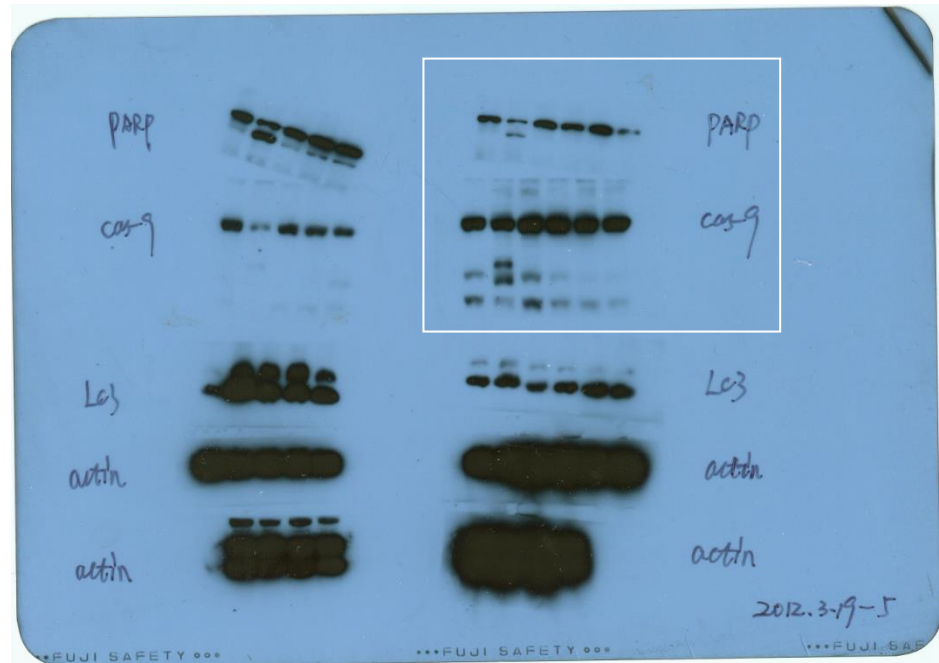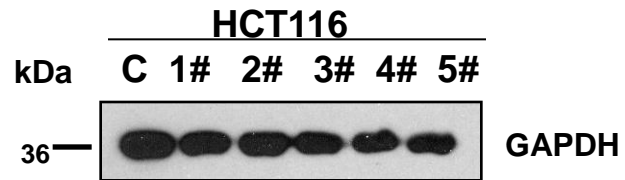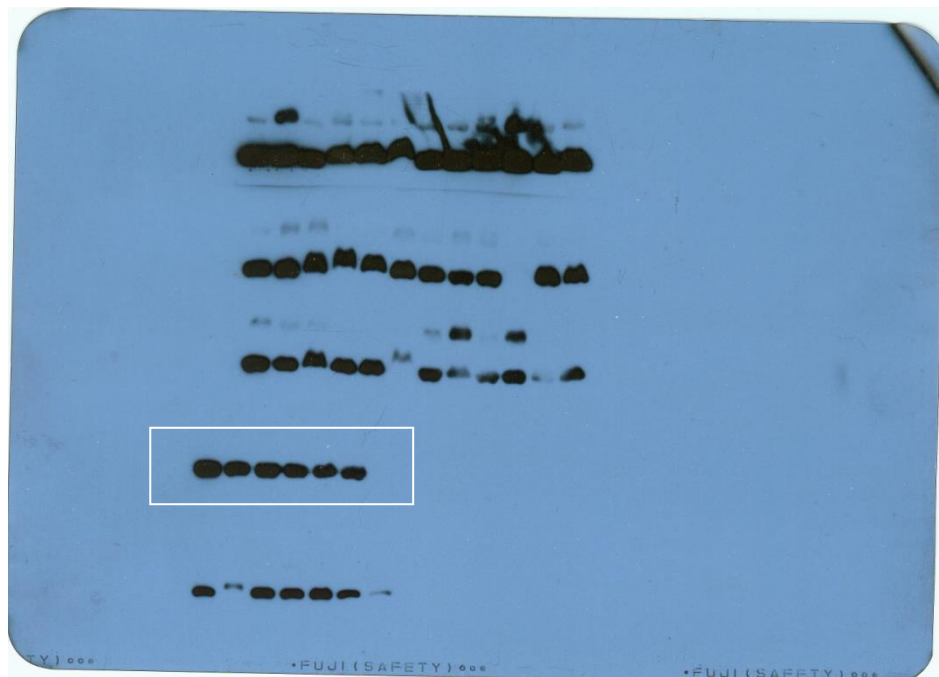

**Supplementary Figure 6**



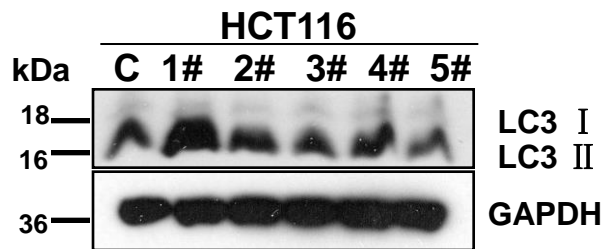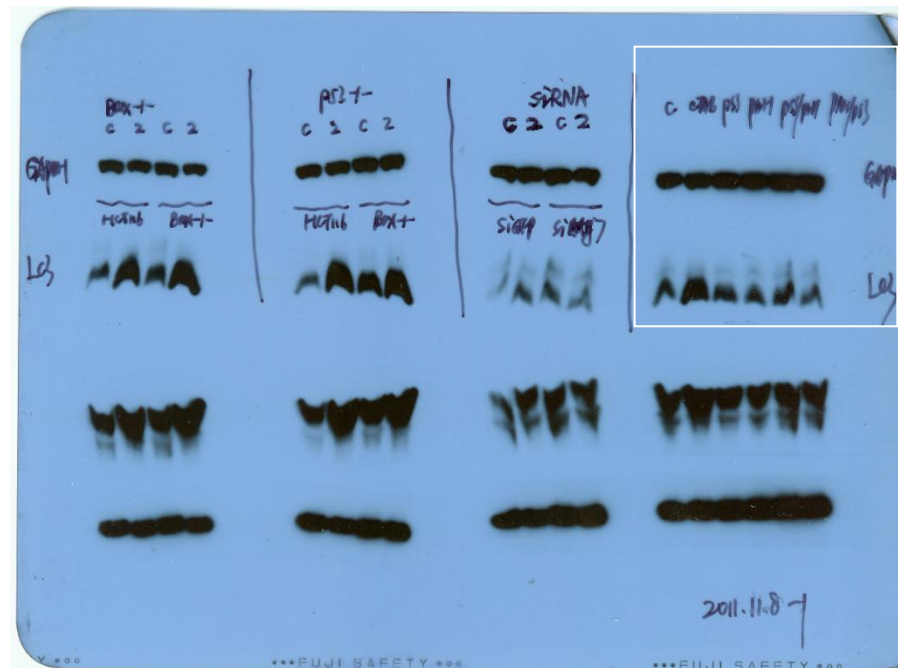

Supplementary Figure 6
